# Supplementary material
Source: Royal Society of Chemistry journal article supplement (doi:10.1039/d5ma01263e)
Supplement: d5ma01263e1.pdf [file d5ma01263e1.pdf]

## Supplementary Information

### **Modulating the visible emission and whispering gallery mode lasing through the self-induced defects in a Ga-doped ZnO tapered microcavity**

Rubia Anwar<sup>1</sup>, Cuong Ton-That<sup>2</sup>, and M. Azizar Rahman<sup>1,\*</sup>

<sup>1</sup>*Department of Physics, Bangladesh University of Engineering and Technology, Old Academic Building, Dhaka-1000, Bangladesh*

<sup>2</sup>*School of Mathematical and Physical Sciences, University of Technology Sydney, Ultimo, NSW 2007, Australia*

\*Corresponding author. Email: [azizar@phy.buet.ac.bd](mailto:azizar@phy.buet.ac.bd)

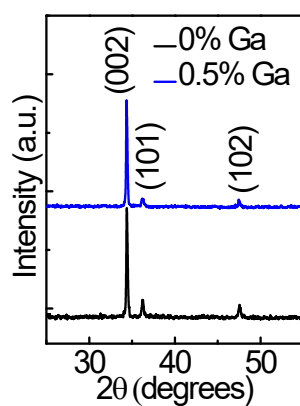

**Fig.S1.** XRD of undoped and Ga-doped ZnO nanorods. XRD patterns for pristine and GZO nanorods show reflections consistent with wurtzite ZnO and a preferred (002) orientation.

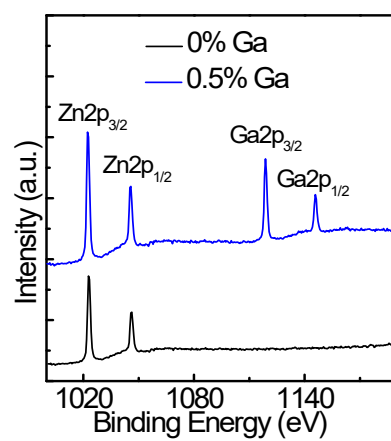

**Fig. S2.** X-ray photoelectron spectroscopy of pristine and GZO microrods. XPS core level spectra confirming Ga incorporation in the microrods.

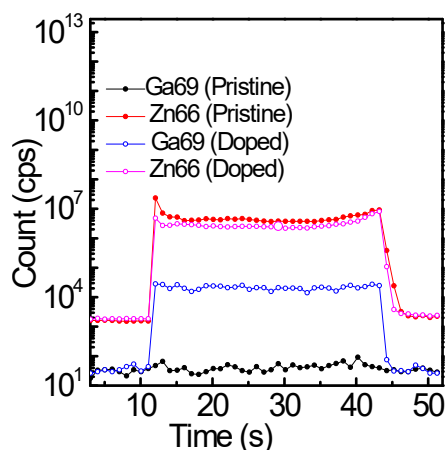

**Fig. S3.** LA-ICP-MS depth profiles confirming Ga incorporation. Time-dependent LA-ICP-MS signals (laser crater  $100\ \mu\text{m}$ , scan  $100\ \mu\text{m s}^{-1}$ , fluence  $4.35\ \text{J cm}^{-2}$ , 10 s runoff) for Zn-66 and Ga-69 in pristine versus Ga-doped nanorods. Ga is detected only in doped samples, with stable signals over the ablation interval, consistent with incorporation through the probed depth. This is for 0.13% Ga-doped ZnO nanorods.

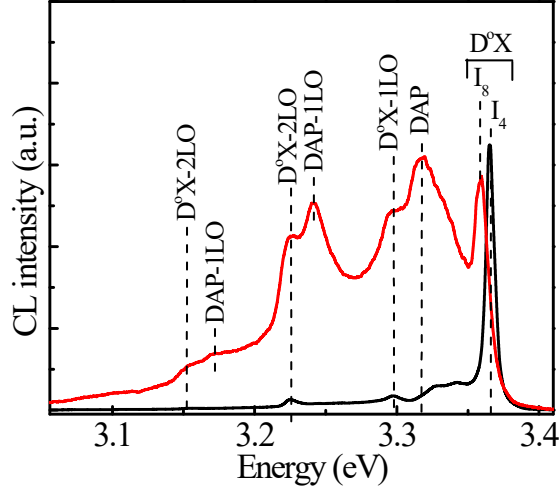

**Fig. S4.** Near-band-edge (NBE) CL spectra of undoped and GZO microrods at 80 K. CL spectra highlighting donor-bound exciton ( $D^{\circ}X$ ) and donor–acceptor pair (DAP) features with assigned  $I_4$  and  $I_8$  lines and their LO-phonon replicas (e.g.,  $D^{\circ}X$ -1LO/2LO, DAP-1LO). The presence of well-resolved NBE lines indicates preserved excitonic quality upon Ga doping.

**Table S1:** The steady state spectra are simulated using equation (A1) of Ref<sup>[1]</sup>. The table show the value of fitting parameters value; where, photon energy ( $\hbar\omega$ ), longitudinal optical phonon ( $\hbar\omega_{LO}$ ), the number of phonon ( $n$ ), the electron-phonon coupling strength ( $S$ ), zero phonon energy ( $E_{ZPL}$ ) and represents the FWHM of the phonon side band ( $\sigma$ ).

| Emission | $\hbar\omega_{LO}$ (eV) | $E_{ZPL}$ (eV)  | $\sigma$ (eV)               | $S$            |
|----------|-------------------------|-----------------|-----------------------------|----------------|
| Green    | $70 \pm 0.1$            | $2.81 \pm 0.01$ | $0.16 \pm 0.01$             | $5.8 \pm 0.05$ |
| Yellow   | $70 \pm 0.1$            | $2.7 \pm 0.02$  | $0.24 \pm 0.003 \text{ eV}$ | $7.1 \pm 0.1$  |

**Table S2.** Multi-exponential TRPL fit parameters for green and yellow emission. Lifetimes  $\tau_i$  and amplitudes  $A_i$  from multi-exponential fits to the time-resolved PL decays of the green and yellow bands. The microsecond-scale components are consistent with defect-mediated recombination; amplitudes  $A_i$  provide the fractional contribution of each channel.

| Emissions | $\tau_1$ ( $\mu\text{s}$ ) | $\tau_2$ ( $\mu\text{s}$ ) | $\tau_3$ ( $\mu\text{s}$ ) | $A_1$ | $A_2$ | $A_3$  |
|-----------|----------------------------|----------------------------|----------------------------|-------|-------|--------|
| Green     | 0.68                       | 2.7                        | 7.44                       | 0.11  | 0.10  | 0.04   |
| Yellow    | 0.72                       | 3.90                       | 36.56                      | 0.24  | 0.022 | 0.0019 |

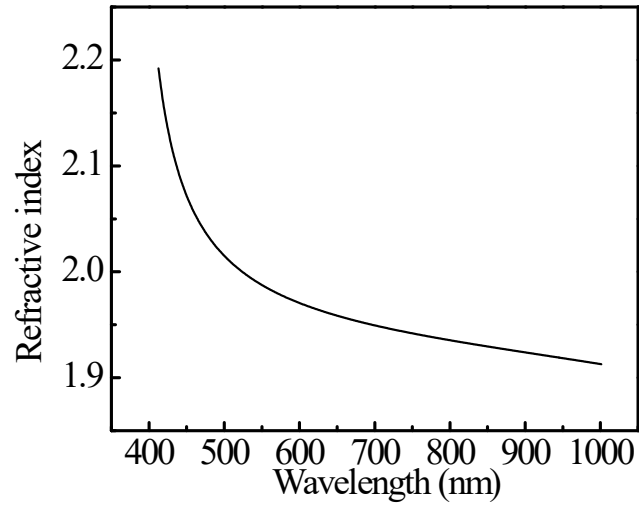

**Fig. S5.** Wavelength-dependent refractive index  $n(\lambda)$  of ZnO (TE polarization). Index values were extracted by fitting measured data with a Sellmeier model and the resulting  $n(\lambda)$  was used in the mode simulations.

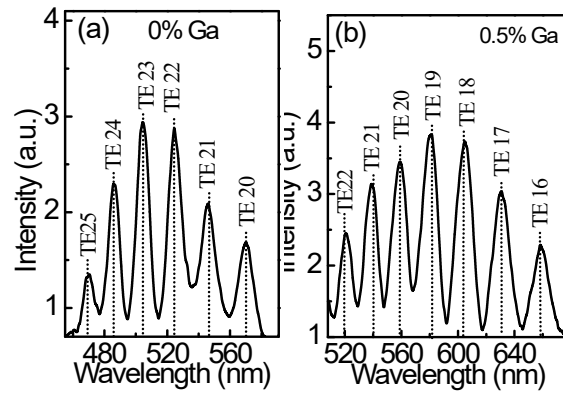

**Fig. S6.** Enlarged views highlighting discrete resonances: (a) Undoped microrod (460 – 590 nm) and (b) GZO microrod (515 – 680 nm). Dashed lines denote TE-polarized modes.

## References

- [1] C. Spindler, F. Babbe, M. H. Wolter, F. Ehré, K. Santhosh, P. Hilgert, F. Werner, S. Siebentritt, *Phys. Rev. Mater.* **2019**, 3, 090302.
